# Supplementary material
Source: Springer Nature journal article supplement (https://www.springermedizin.de/resource/supplementary/12916_2012_783_MOESM16_ESM.pdf/9598276)

at t0: before start of the race

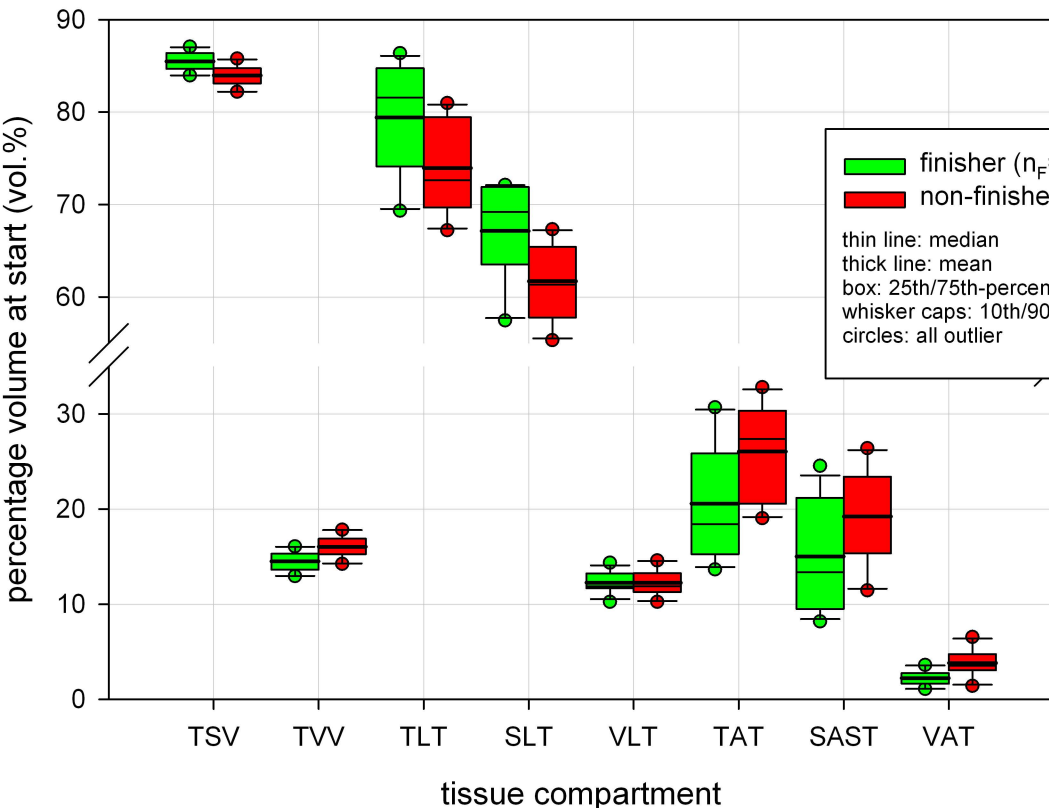

at t1: first measurement interval (distance run: 317-789 km)

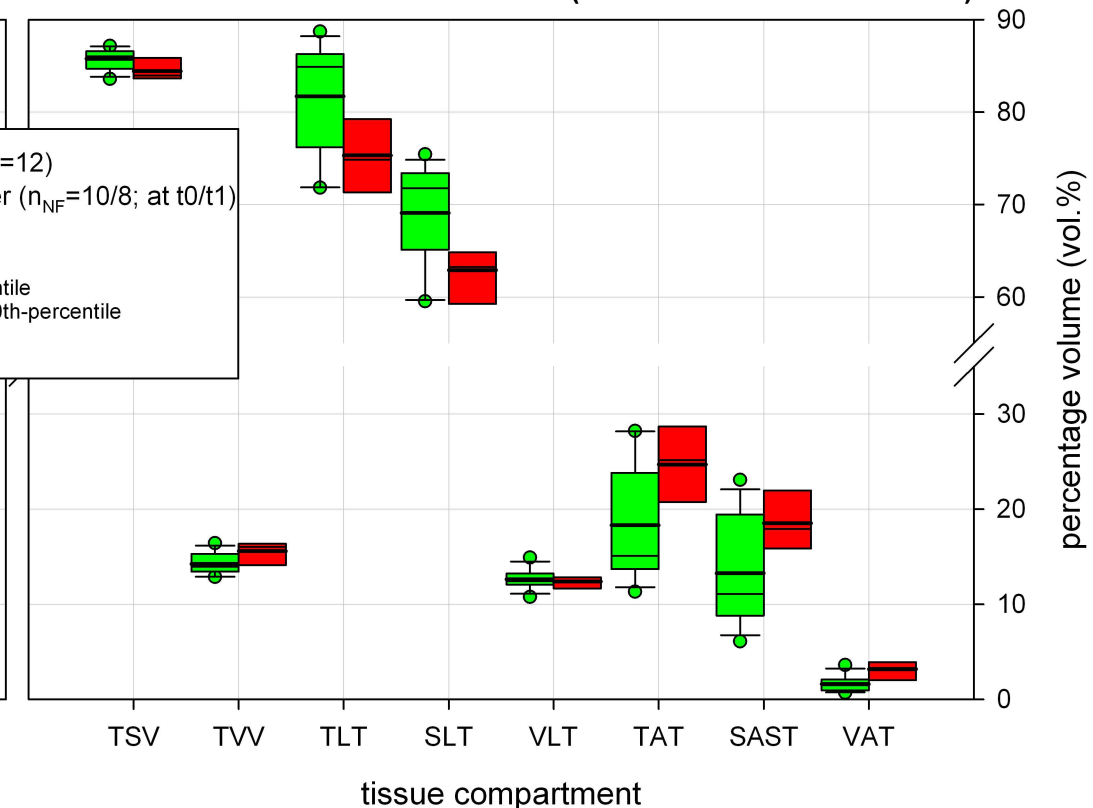

Supplement: MOESM16 [file 9598276]
